## Retraction

## Retraction of: Esophageal carcinoma cell-excreted exosomal uc.189 promotes lymphatic metastasis

Zhiyan Ding<sup>1</sup>, Yun Yan<sup>1,2</sup>, Yu Lian Guo<sup>2</sup>, Chenghai Wang<sup>2,3</sup>

<sup>1</sup>Department of Pathology, The Affiliated Hospital of Yangzhou University, Yangzhou University, Yangzhou 225009, PR China

<sup>2</sup>Institute of Translational Medicine, Medical College, Yangzhou University, Yangzhou 225001, PR China

<sup>3</sup>Jiangsu Key Laboratory of Integrated Traditional Chinese and Western Medicine for Prevention and Treatment of Senile Diseases, Yangzhou University, Yangzhou 225001, PR China

**Correspondence to:** Chenghai Wang; email: [chwang@yzu.edu.cn](mailto:chwang@yzu.edu.cn)

**Keywords:** exosomal uc.189, HLECs, lymphangiogenesis, metastasis esophageal carcinoma

**Original article:** *Aging (Albany NY)* 2021; 13:13846–13858

PMID: [34024769](https://pubmed.ncbi.nlm.nih.gov/34024769/)

PMCID: [PMC8202844](https://pubmed.ncbi.nlm.nih.gov/PMC8202844/)

doi: [10.18632/aging.202979](https://doi.org/10.18632/aging.202979)

**This article has been retracted:** The journal's investigation was initiated following a retraction request from the corresponding author Chenghai Wang. The stated reason for this request was “misquoted a fund (Chinese National Nature Science Foundation, No. 81471547).” Our investigation by the Scientific Integrity office identified further concerns:

- Image forensics analysis found image manipulations, including blurring and splicing, in the Western blot (WB) images presented in Figure 6D.
- The WB images used in Figure 4D were reused from Figure 6D of a paper published in *Aging* in 2020 [1], which shares one co-author, Chenghai Wang.

The Scientific Integrity office attempted to contact the authors regarding these concerns but did not receive a reply. The editorial decision was made to retract the article, and the authors were notified of this decision.

### REFERENCES

1. Qi T, Cao H, Sun H, Feng H, Li N, Wang C, Wang L. piR-19166 inhibits migration and metastasis through CTTN/MMPs pathway in prostate carcinoma. *Aging (Albany NY)*. 2020; 12:18209–20. <https://doi.org/10.18632/aging.103677>  
PMID:[32881713](https://pubmed.ncbi.nlm.nih.gov/32881713/)
